# Supplementary material for: Cytotoxic phenanthroline derivatives alter metallostasis and redox homeostasis in neuroblastoma cells
Source: PubMed Central journal article supplement (PMC6284747; doi:10.18632/oncotarget.26346), 2018-11-20
Supplement: oncotarget-09-36289-s001.pdf [file oncotarget-09-36289-s001.pdf]

## Cytotoxic phenanthroline derivatives alter metallostasis and redox homeostasis in neuroblastoma cells

### SUPPLEMENTARY MATERIALS

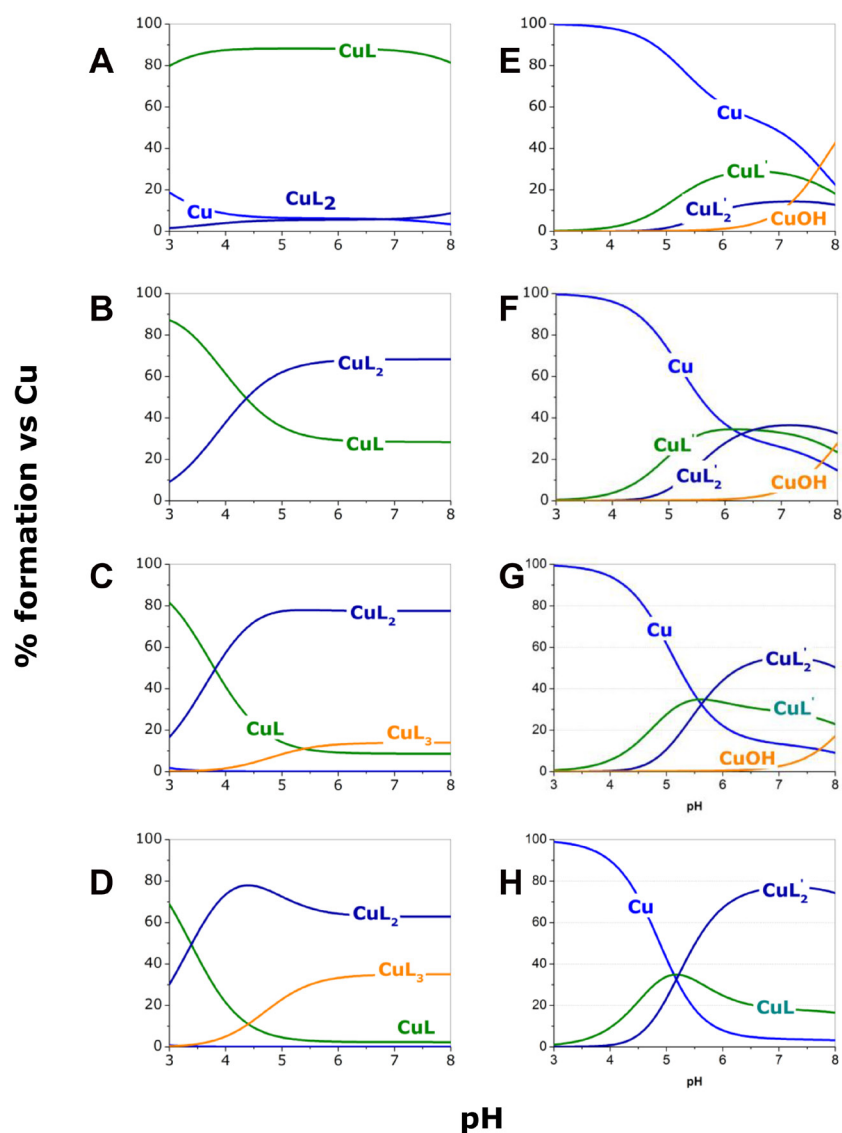

**Supplementary Figure 1: Species distribution computed for phenidone (L) and cuproindione (L').** In all species distribution diagrams Cu<sup>2+</sup> is 1.9 μM; in (A–D) as well as in (E–H) the ligand is 1,2,3 and 5 times the copper concentration, respectively. Species forming in concentrations <5% are omitted for clarity.

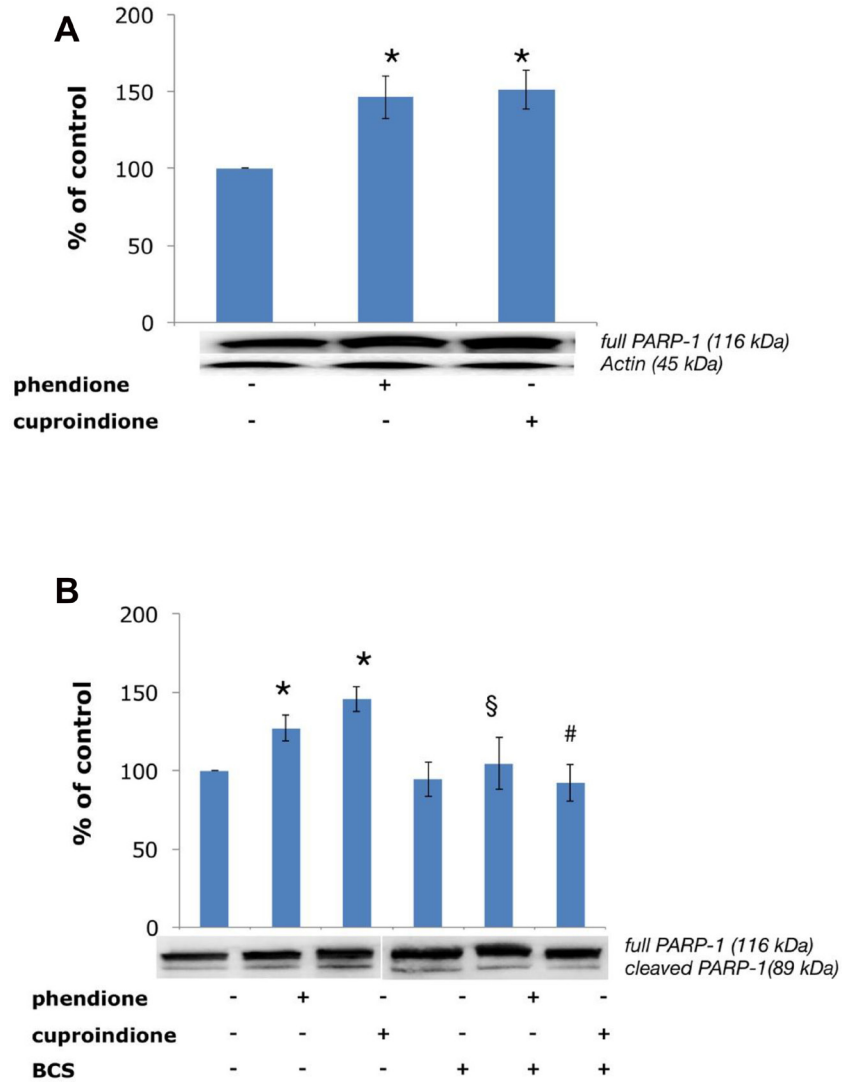

**Supplementary Figure 2: Expression and cleavage of PARP-1 in SH-SY5Y cells after treatment with phendione or cuproindione or pre-incubation with BCS.** Expression and cleavage of PARP-1 in SH-SY5Y cells after treatment with 0.1  $\mu$ M (A) or IC50 concentration (B) of phendione or cuproindione for 48 hrs either in the basal culture medium or after pre-incubation (3 hrs) with 50  $\mu$ M BCS. The data in (B) represent the percent of cleaved PARP-1 (89 kDa)/full PARP-1 (116 kDa) ratios. Results are expressed as mean  $\pm$  SEM over at least three independent experiments (\* $p \leq 0.05$  level vs phendione, § $p \leq 0.05$  level vs phendione, # $p \leq 0.05$  level vs cuproindione; One-way Anova)

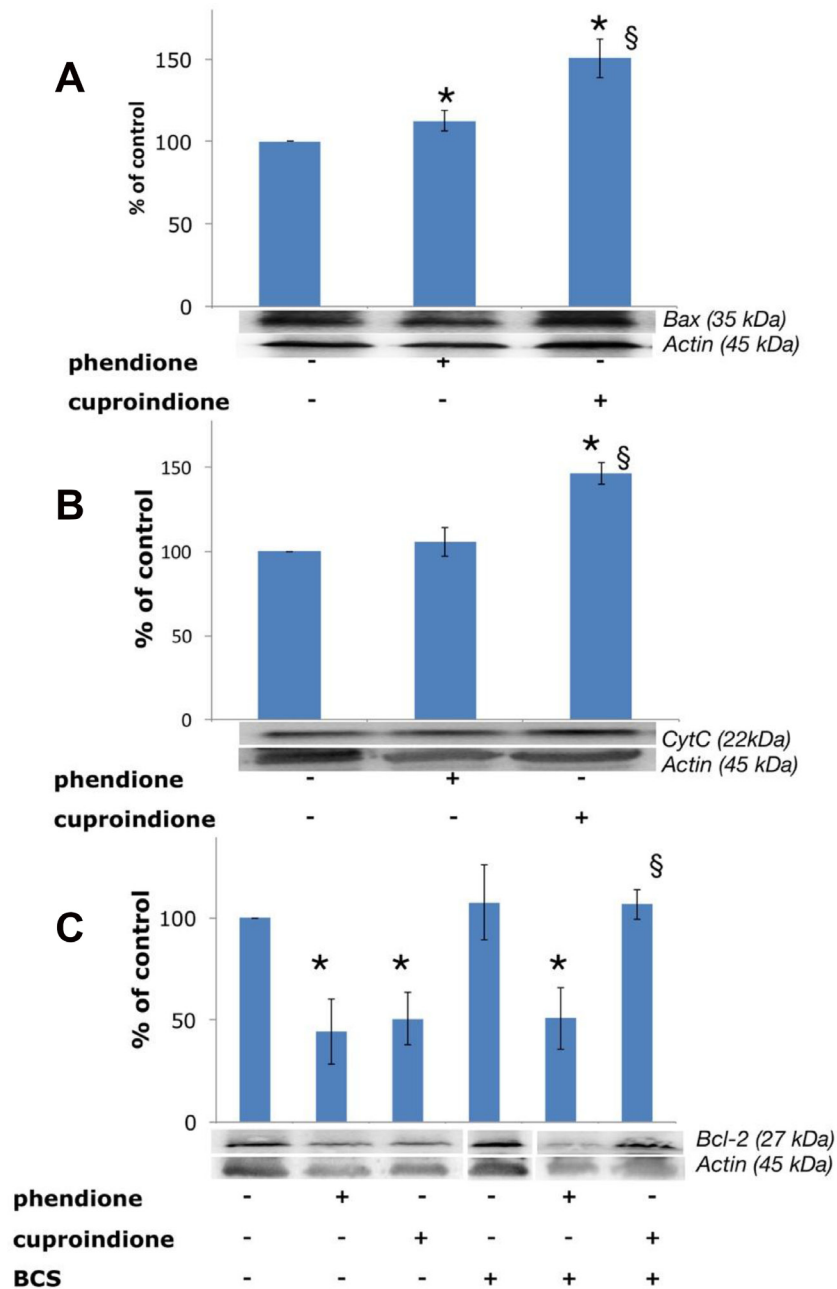

**Supplementary Figure 3: Levels of Bax in the mitochondrial fractions and of cytochrome C in the cytoplasm fractions for cells treated with phendione or cuproindione.** Levels of Bax in the mitochondrial fractions (A) and of cytochrome C in the cytoplasm fractions (B) for neuroblastoma cells after a 90-min treatment with a phendione and cuproindione  $3 \times IC_{50}$  concentration. Expression of Bcl-2 (C) after a 48-hrs treatment with  $IC_{50}$  concentration of phendione and cuproindione in the absence and in the presence of  $50 \mu M$  BCS. Representative WBs of the extracts are shown. Results are mean  $\pm$  SEM over at least three independent experiments (\* $p \leq 0.05$  level with respect to control, § $p \leq 0.05$  level with respect to phendione; One-way Anova).

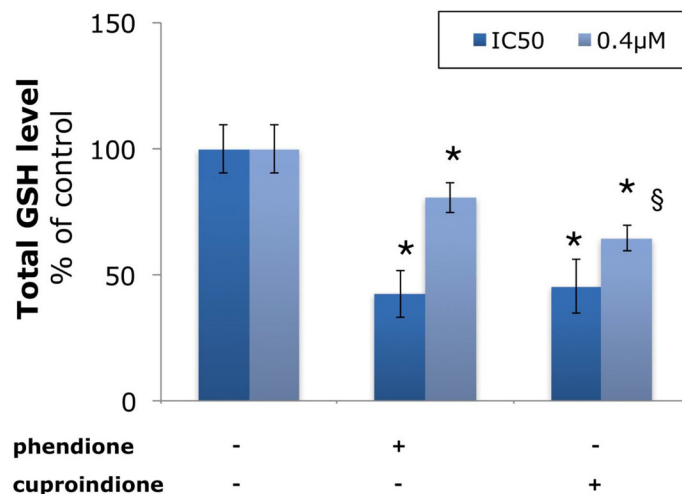

**Supplementary Figure 4: Effect of phendione or cuproindione on total GSH level in cells 24-hrs treated with IC50 or 0.4 μM concentrations.** Results are expressed as mean ± SEM from triplicate experiments and normalized with respect to the control untreated cells. (\* $p \leq 0.05$  level with respect to control; § $p \leq 0.05$  level with respect to phendione; One-way Anova).

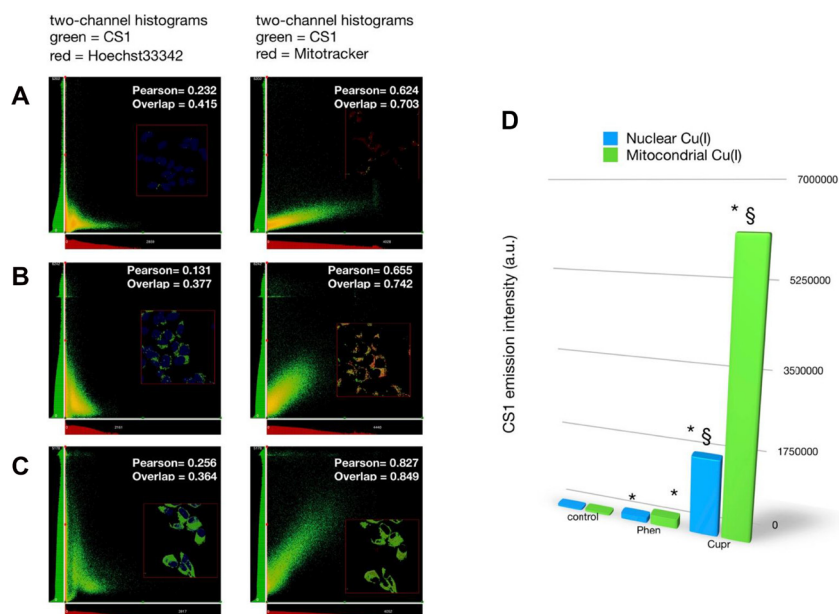

**Supplementary Figure 5: Quantitative results of co-localization and copper uptake in the nuclei and mitochondria of cells treated with phendione or cuproindione.** Quantitative results of co-localization (A–C) and copper uptake (D) in the nuclei and mitochondria of untreated neuroblastoma cells (A) and in cells treated for 90 min with 4.4 M phendione (B) or 2.2 M cuproindione (C). Results in (D) are expressed as mean ± SEM over at least three independent experiments. (\* $p \leq 0.05$  level with respect to control, § $p \leq 0.05$  level with respect to phendione; One-way Anova).
